# Supplementary material for: The interaction of H2O2 with exchanged titanium oxide systems (TS-1, TiO2, [Ti]-APO-5, Ti-ZSM-5)Electronic supplementary information (ESI) available: XRD patterns and further EPR spectra. See http://www.rsc.org/suppdata/cp/b3/b306398b/
Source: Royal Society of Chemistry journal article supplement (doi:10.1039/b306398b), 2003-01-01
Supplement: b306398b.pdf [file b306398b.pdf]

**The Interaction of H<sub>2</sub>O<sub>2</sub> with exchanged Titanium Oxide Systems  
(TS-1, TiO<sub>2</sub>, [Ti]-APO-5, Ti-ZSM-5)**

**<sup>1</sup>Karen L. Antcliff, <sup>1</sup>Emyr Griffiths, <sup>1</sup>Damien M. Murphy\* and <sup>2</sup>Elio Giamello**

*<sup>1</sup>Department of Chemistry, Cardiff University, PO Box 912, Cardiff CF10 3TB, UK.*

*<sup>2</sup>Dipartimento di Chimica IFM, Università di Torino, Via P. Guria 9, 10125 Torino, Italy*

**SUPPLEMENTARY FIGURES**

Calcined [Ti]-APO-5

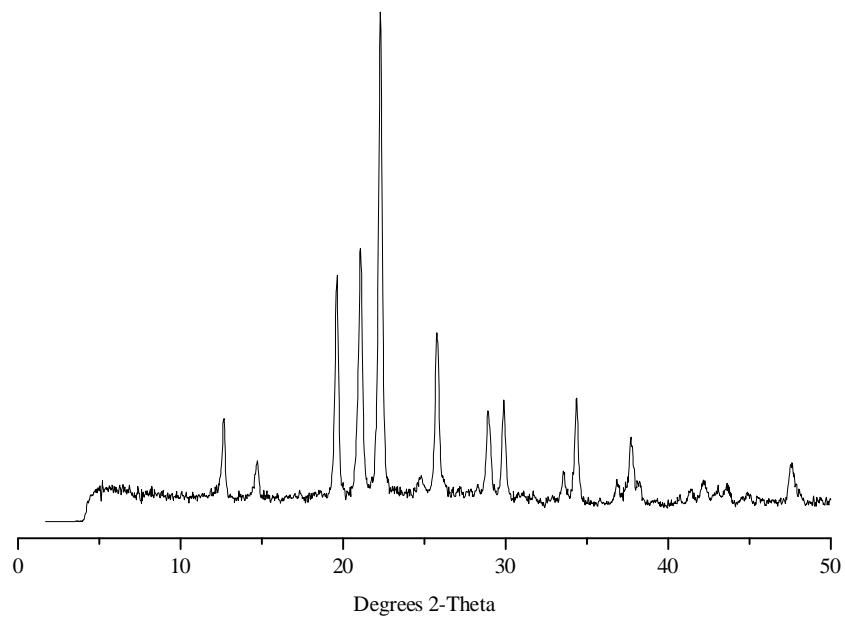

Calcined TS-1

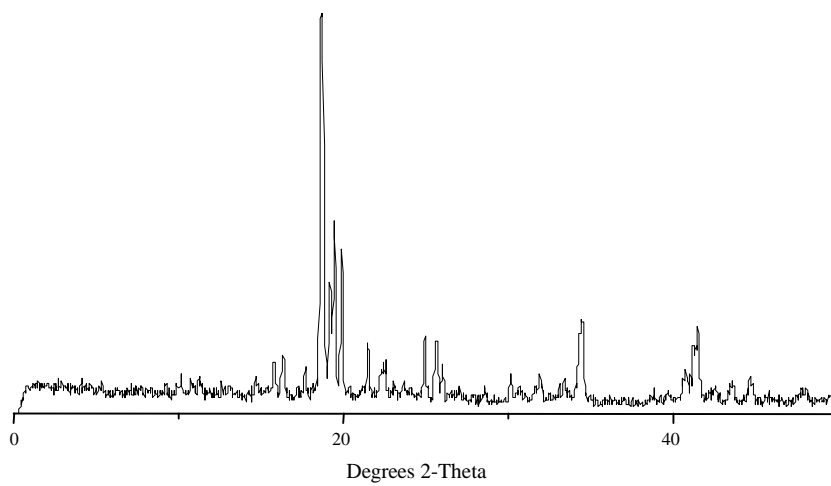

**Figure 1;** XRD patterns for the calcined [Ti]-APO-5 and TS-1 samples

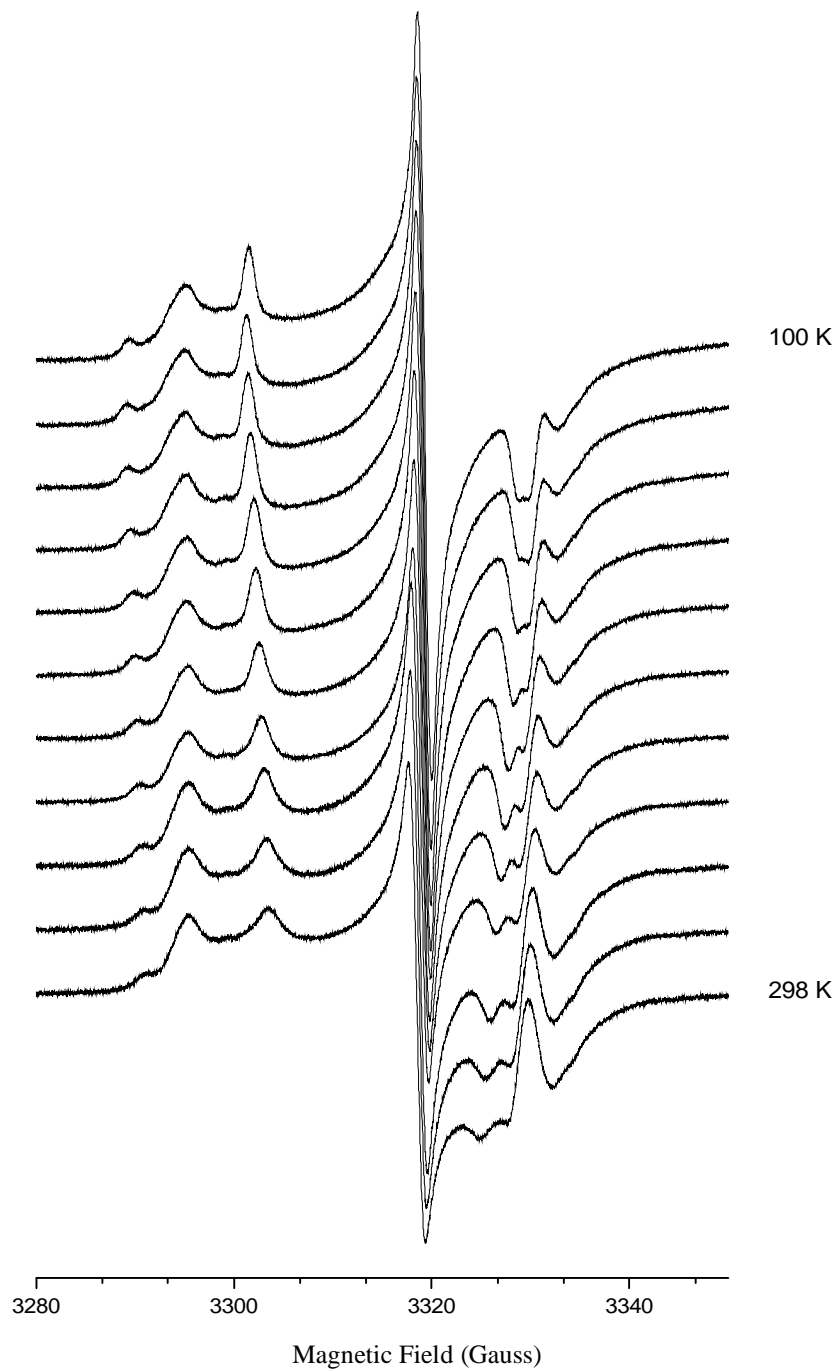

**Figure 2;** EPR spectra of  $O_2^-$  formed on thermally reduced TiO<sub>2</sub> (rutile)

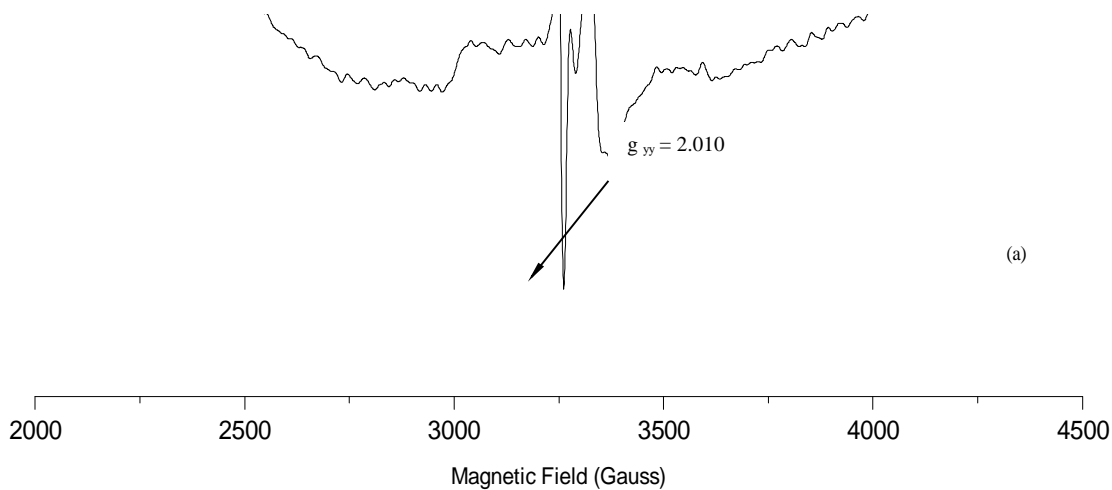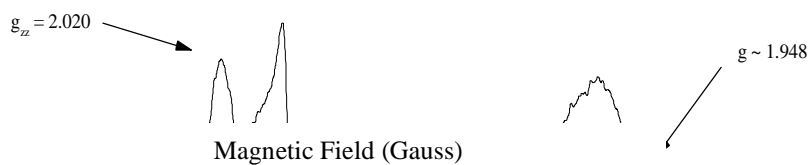

**Figure 3;** EPR spectra of CO reduced TS-1, after addition of  $O_2$ . The signal due to unreacted  $Ti^{3+}$  centres is visible at  $g = 1.948$ .

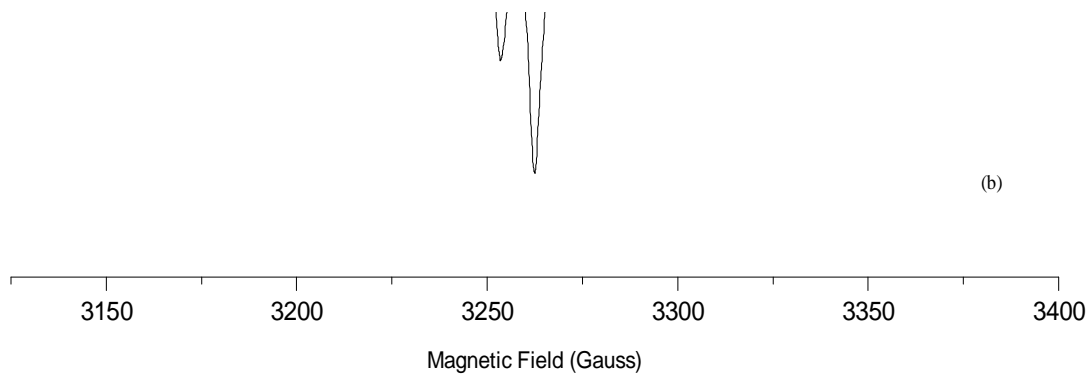

EPR spectra of TS-1 (a) reduced by CO and (b) formation of  $O_2^-$  upon addition of  $O_2$



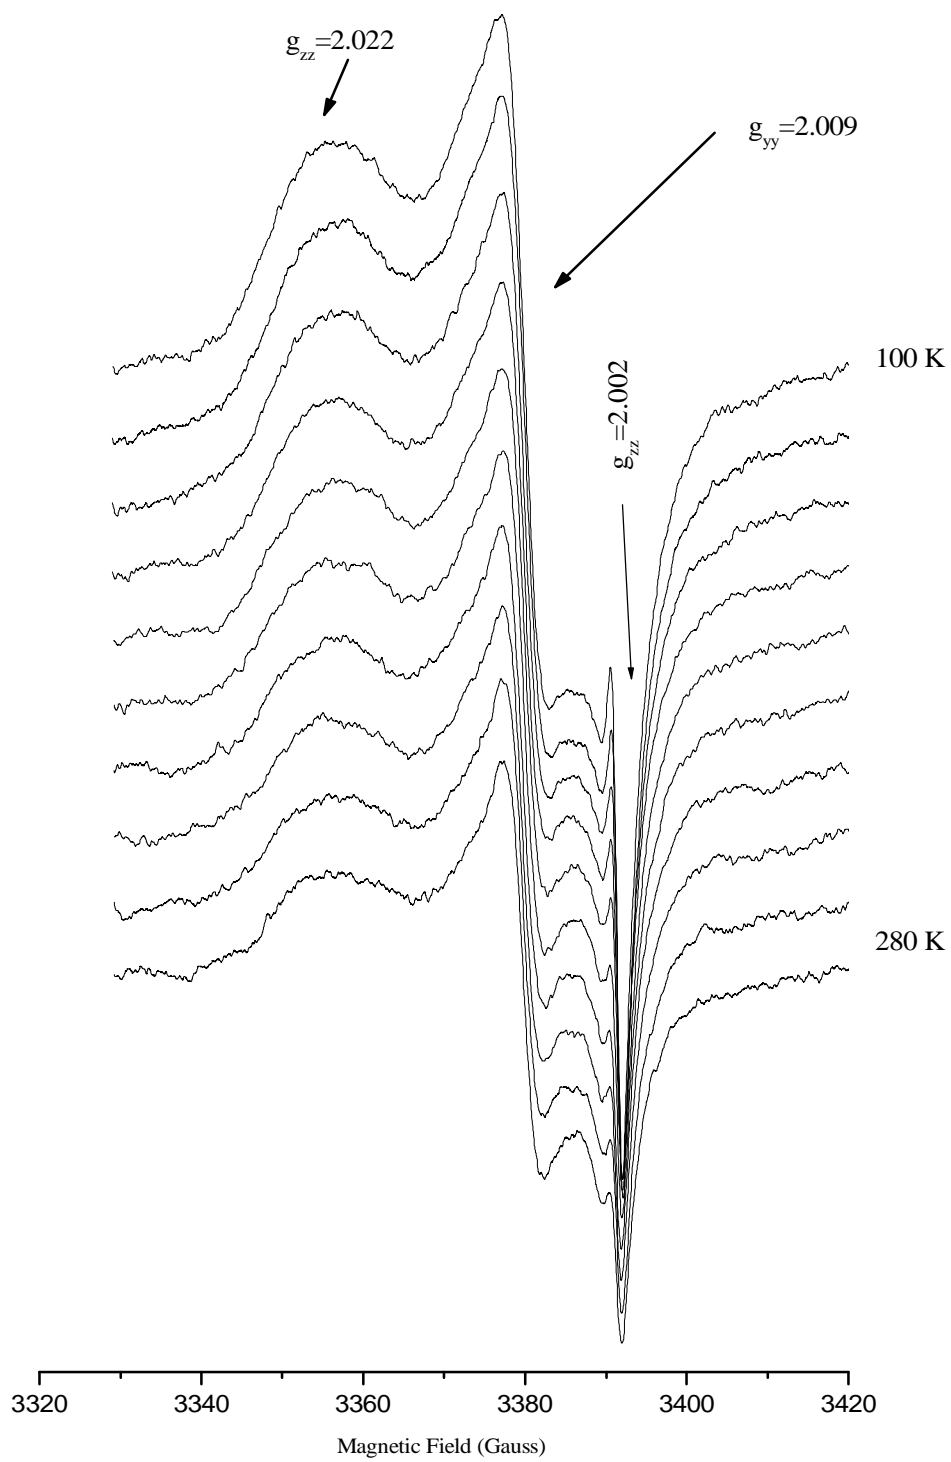

**Figure 4;** EPR spectra of 60 wt% H<sub>2</sub>O<sub>2</sub> treated [Ti]-APO-5 *before* evacuation of the sample.

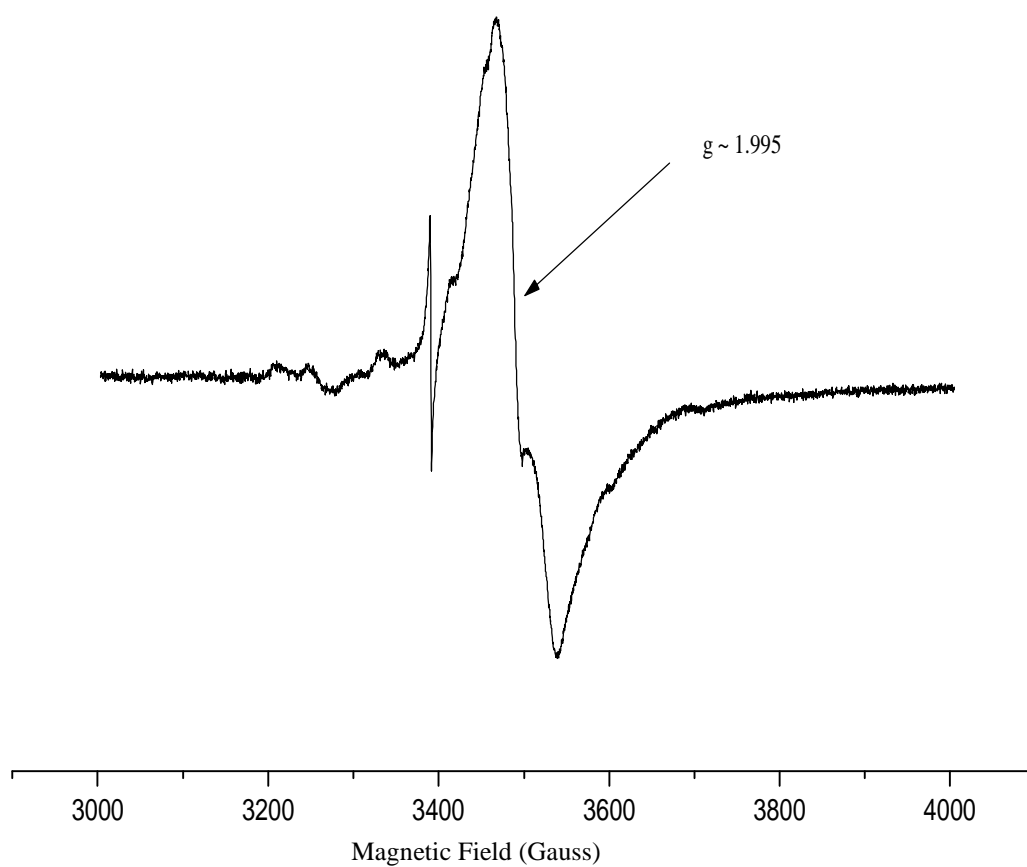

**Figure 5;** EPR spectra of CO reduced [Ti]-APO-5 *before* addition of molecular oxygen.

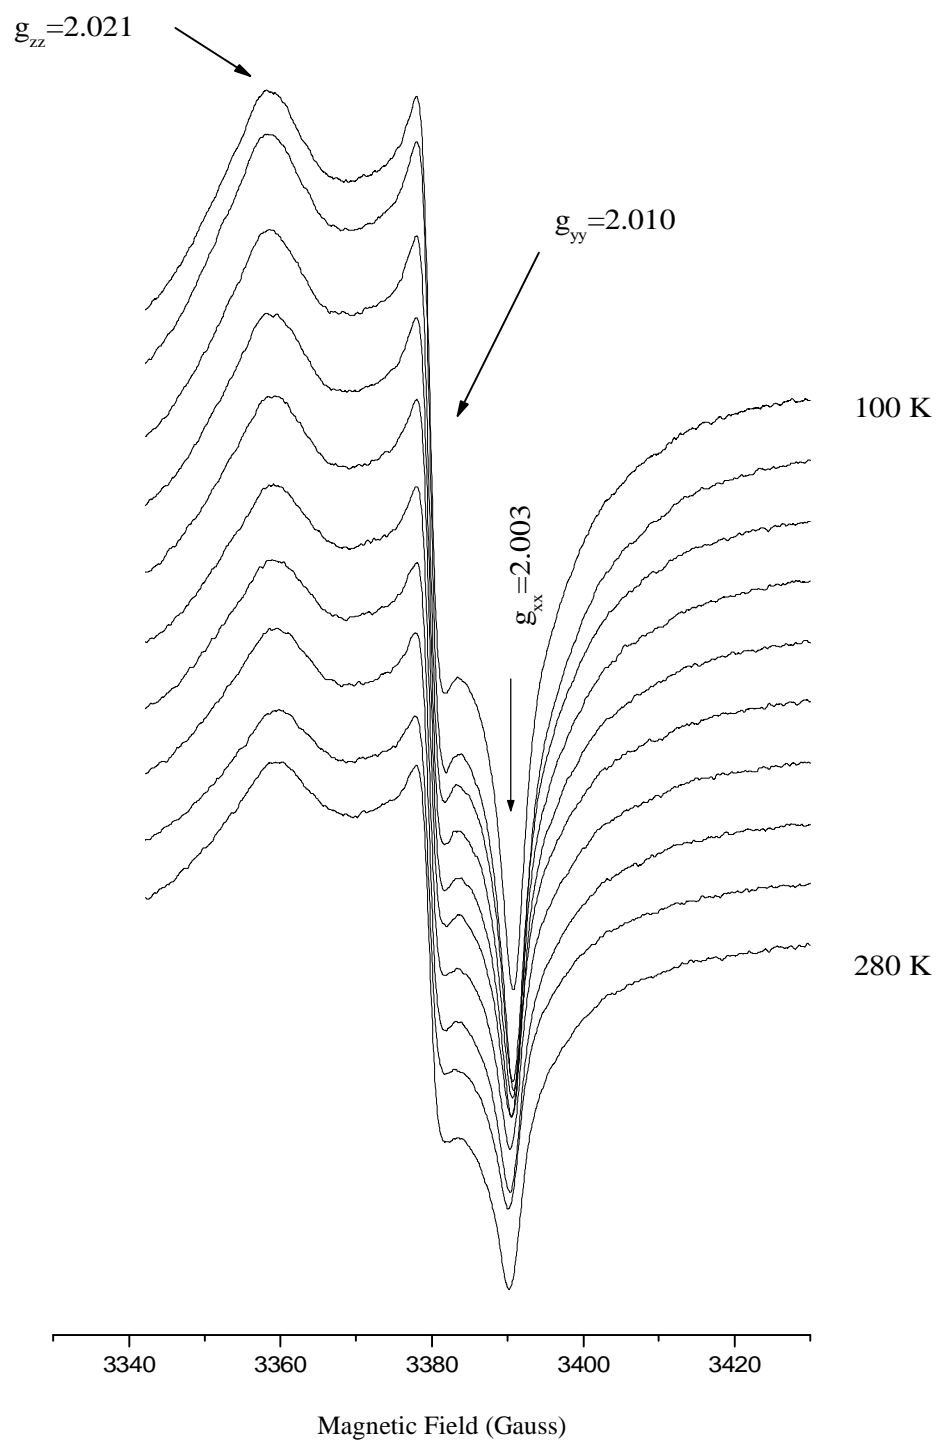

**Figure 6;** EPR spectra of 60 wt% H<sub>2</sub>O<sub>2</sub> treated Ti-ZSM-5 after evacuation at 298K for 1 hour.
